# Supplementary material for: Impact of frailty on outcomes following coronary artery bypass grafting: a systematic review and meta-analysis
Source: PubMed Central journal article supplement — BMC Surg. 2024 Dec 27;24:419. doi: 10.1186/s12893-024-02728-1 (PMC11673924; doi:10.1186/s12893-024-02728-1), 2024-12-27

# Sensitivity Analysis

## Outcome: Mortality at 30 days

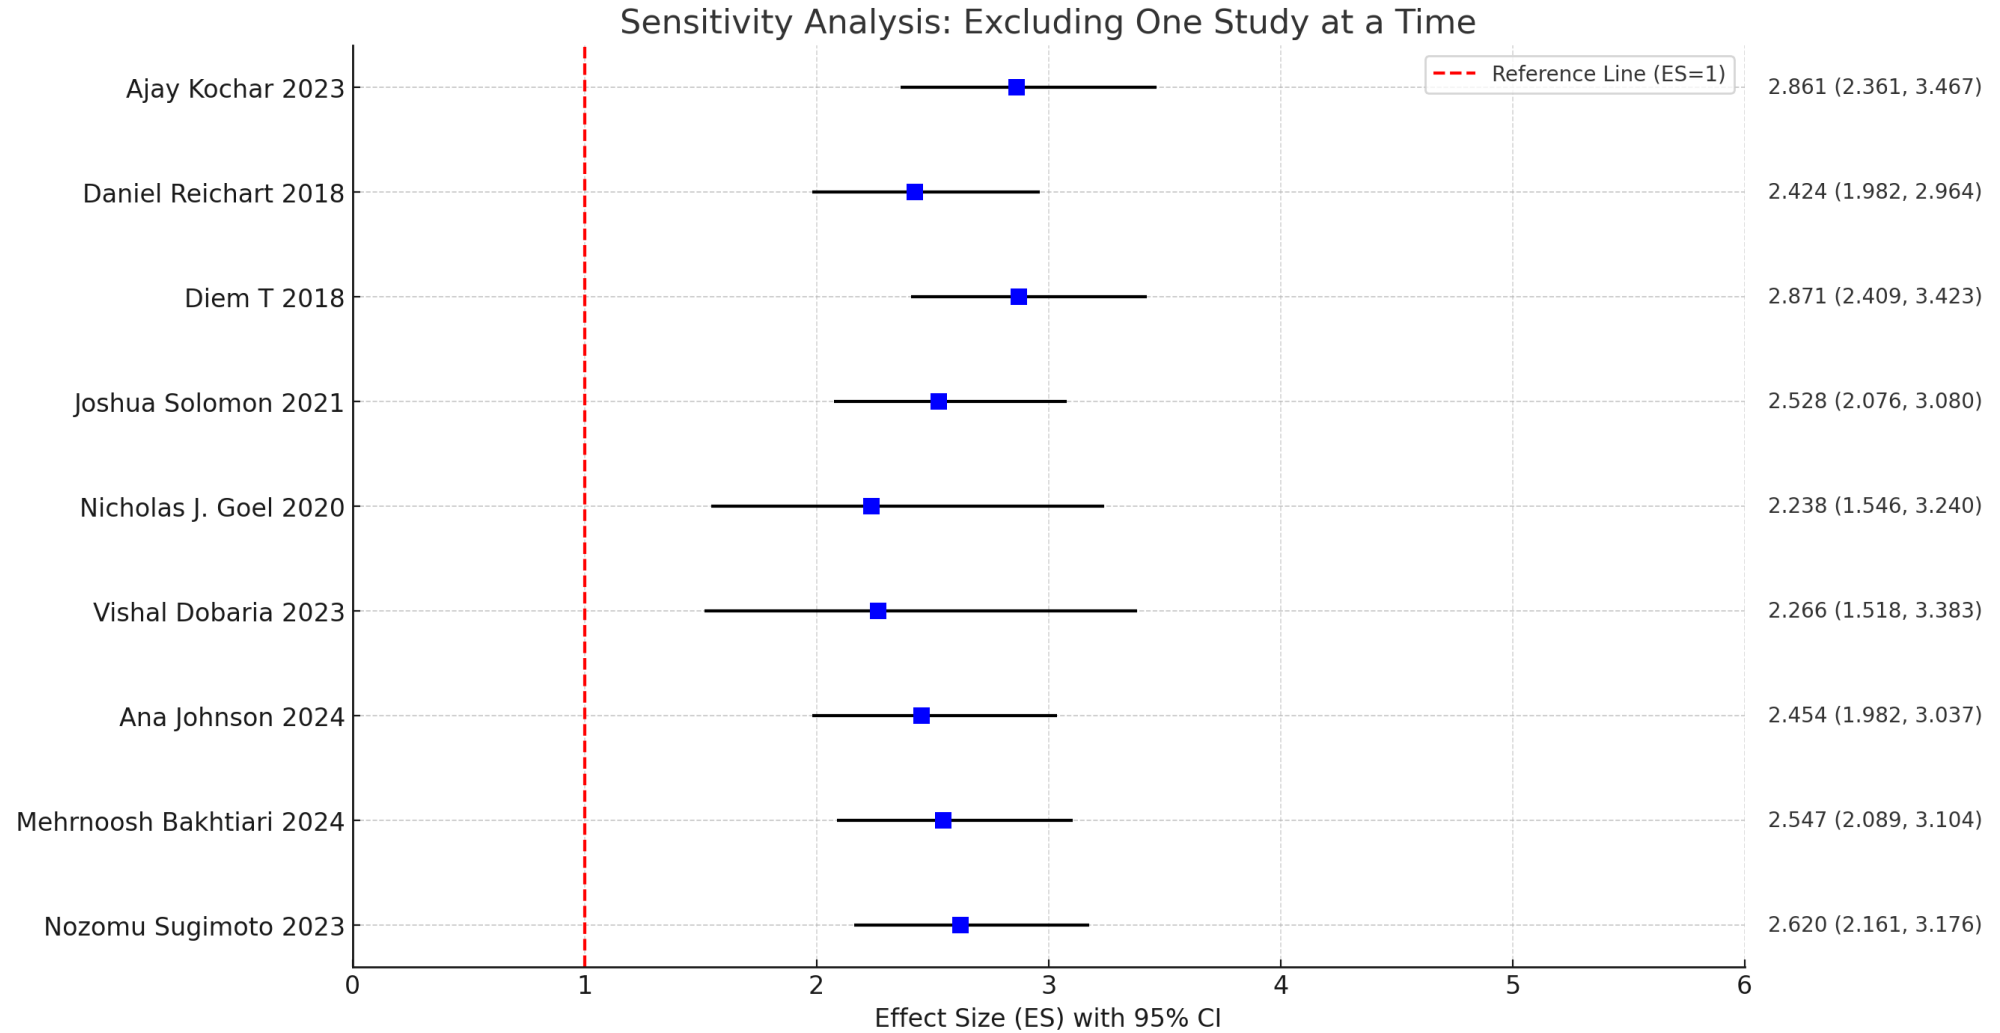

# Sensitivity Analysis

## Outcome: Mortality at 1 year

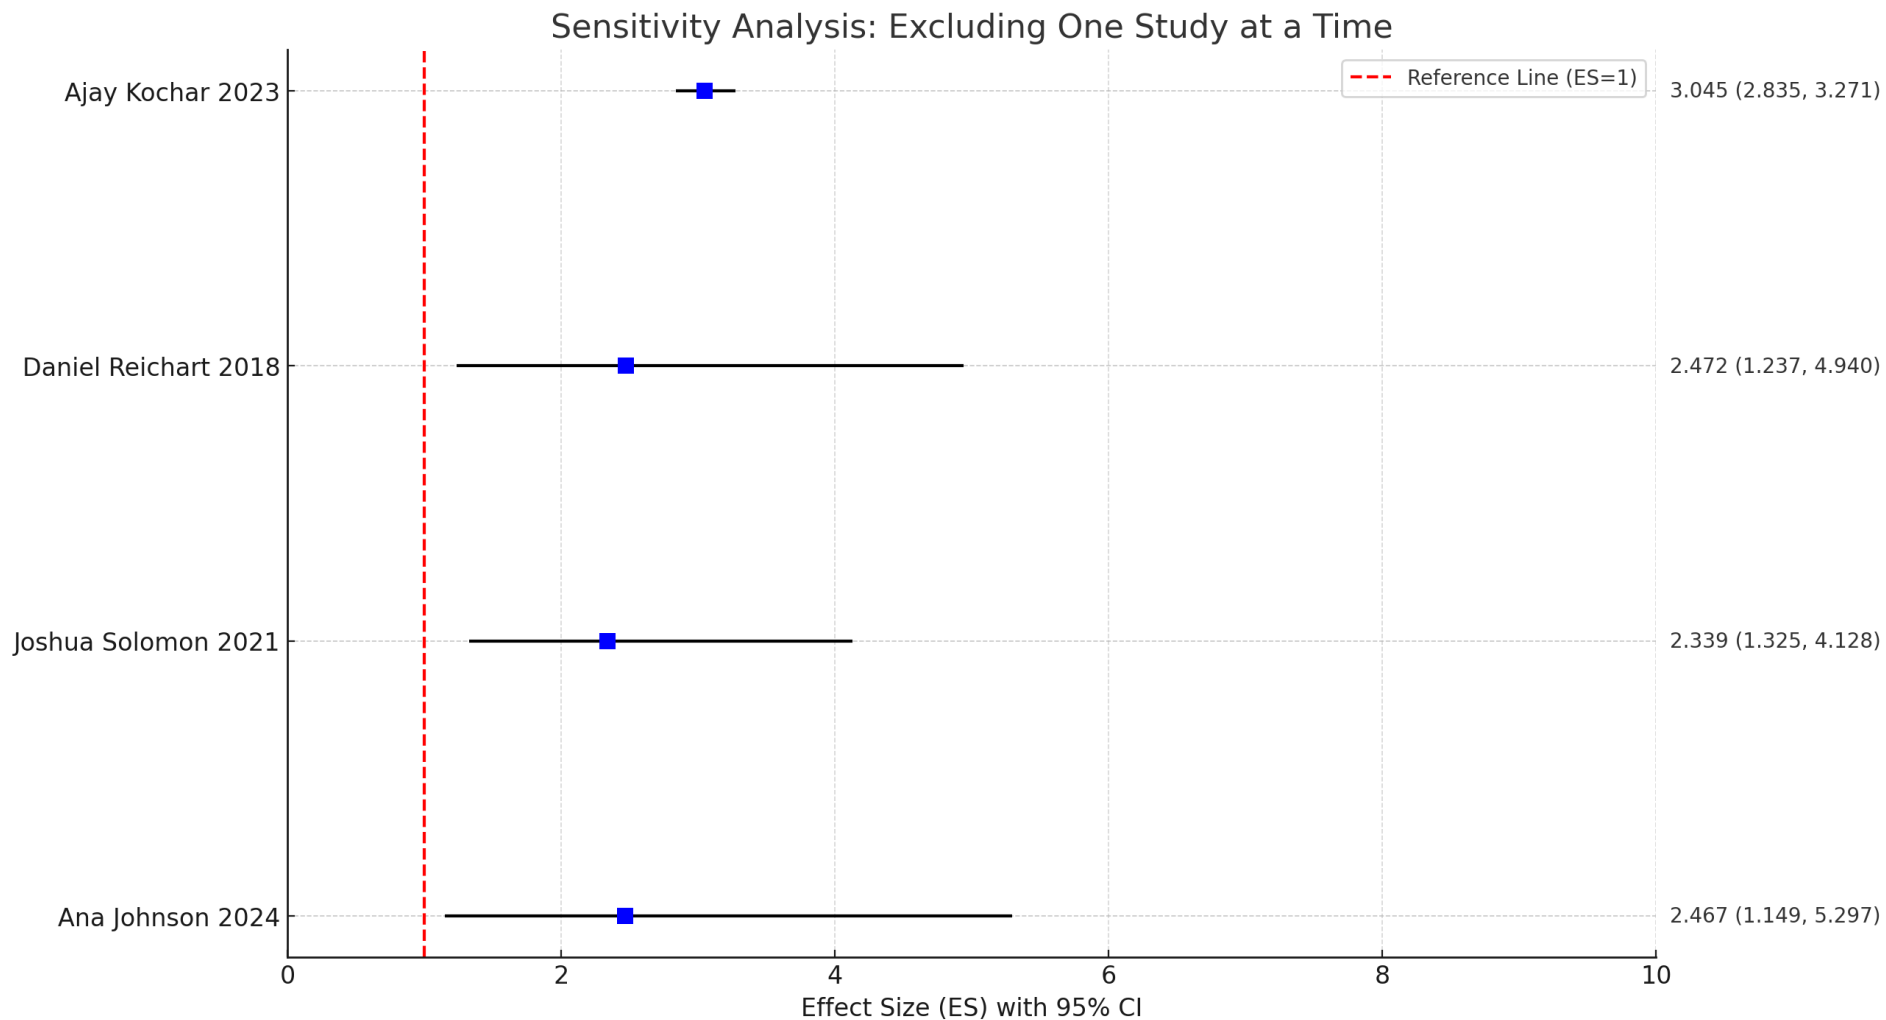

# Sensitivity Analysis

## Outcome: Readmission

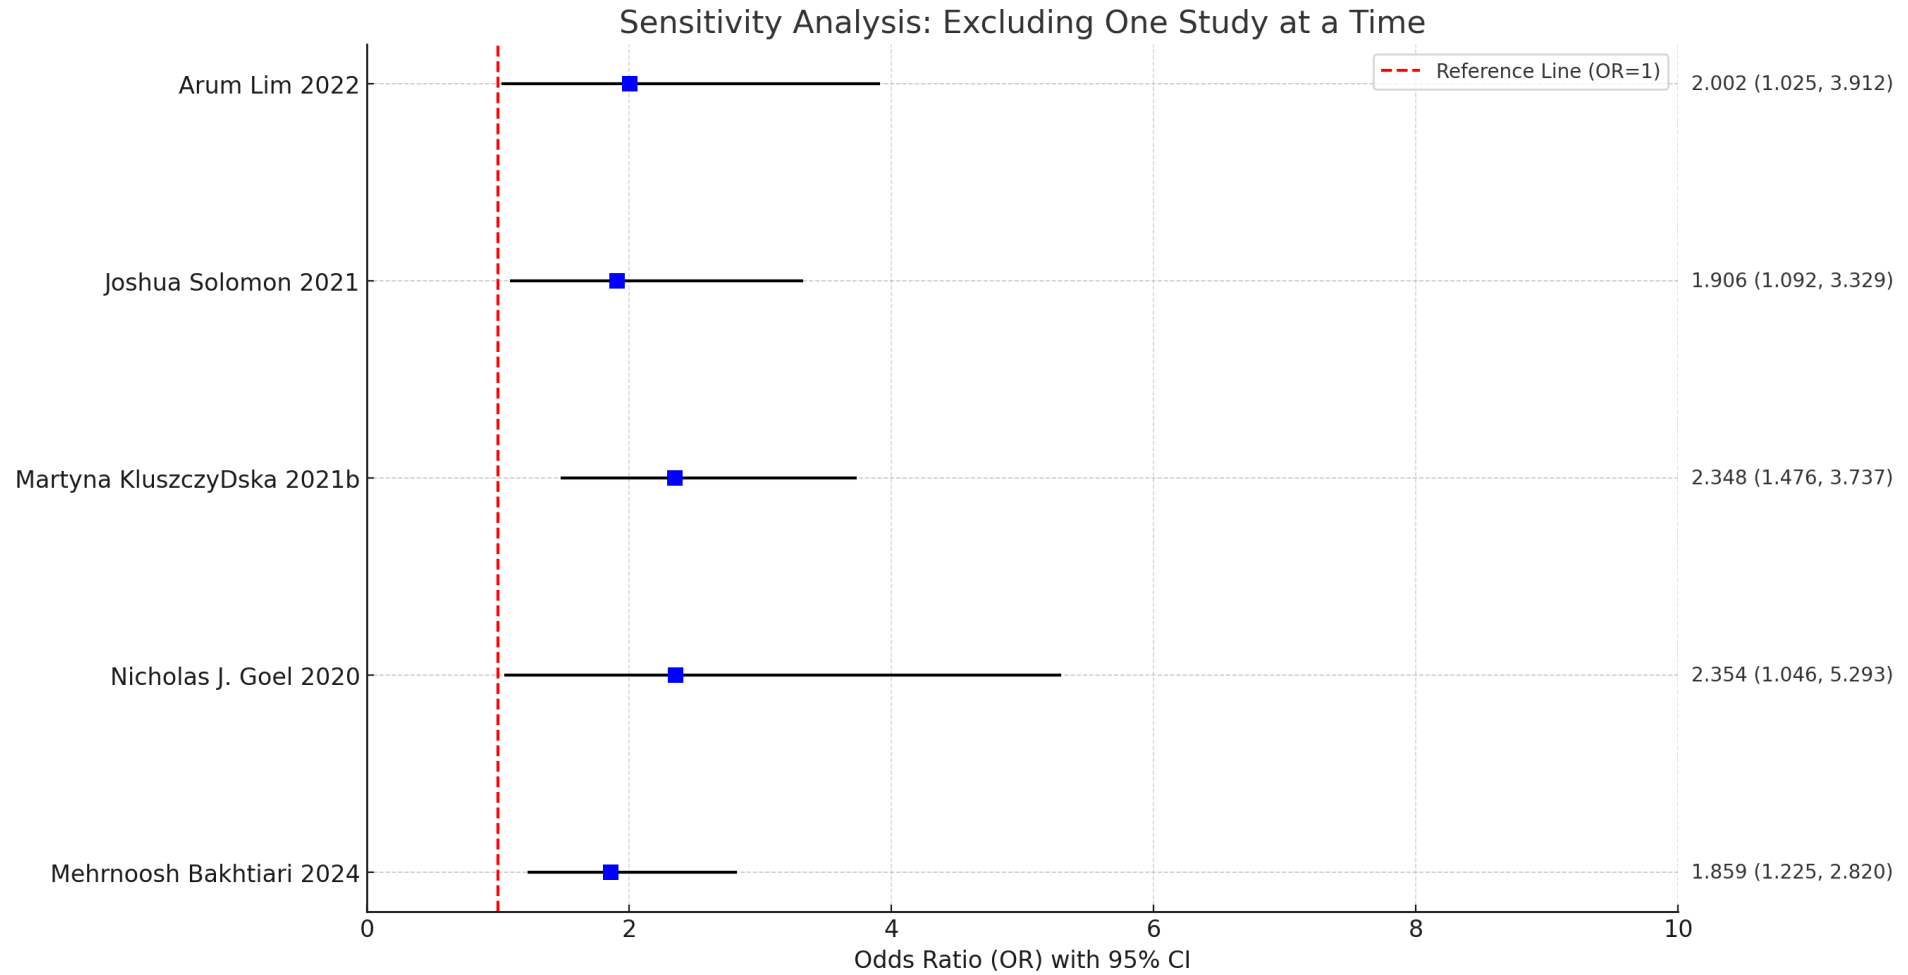

# Sensitivity Analysis

## Outcome: Acute Kidney Injury

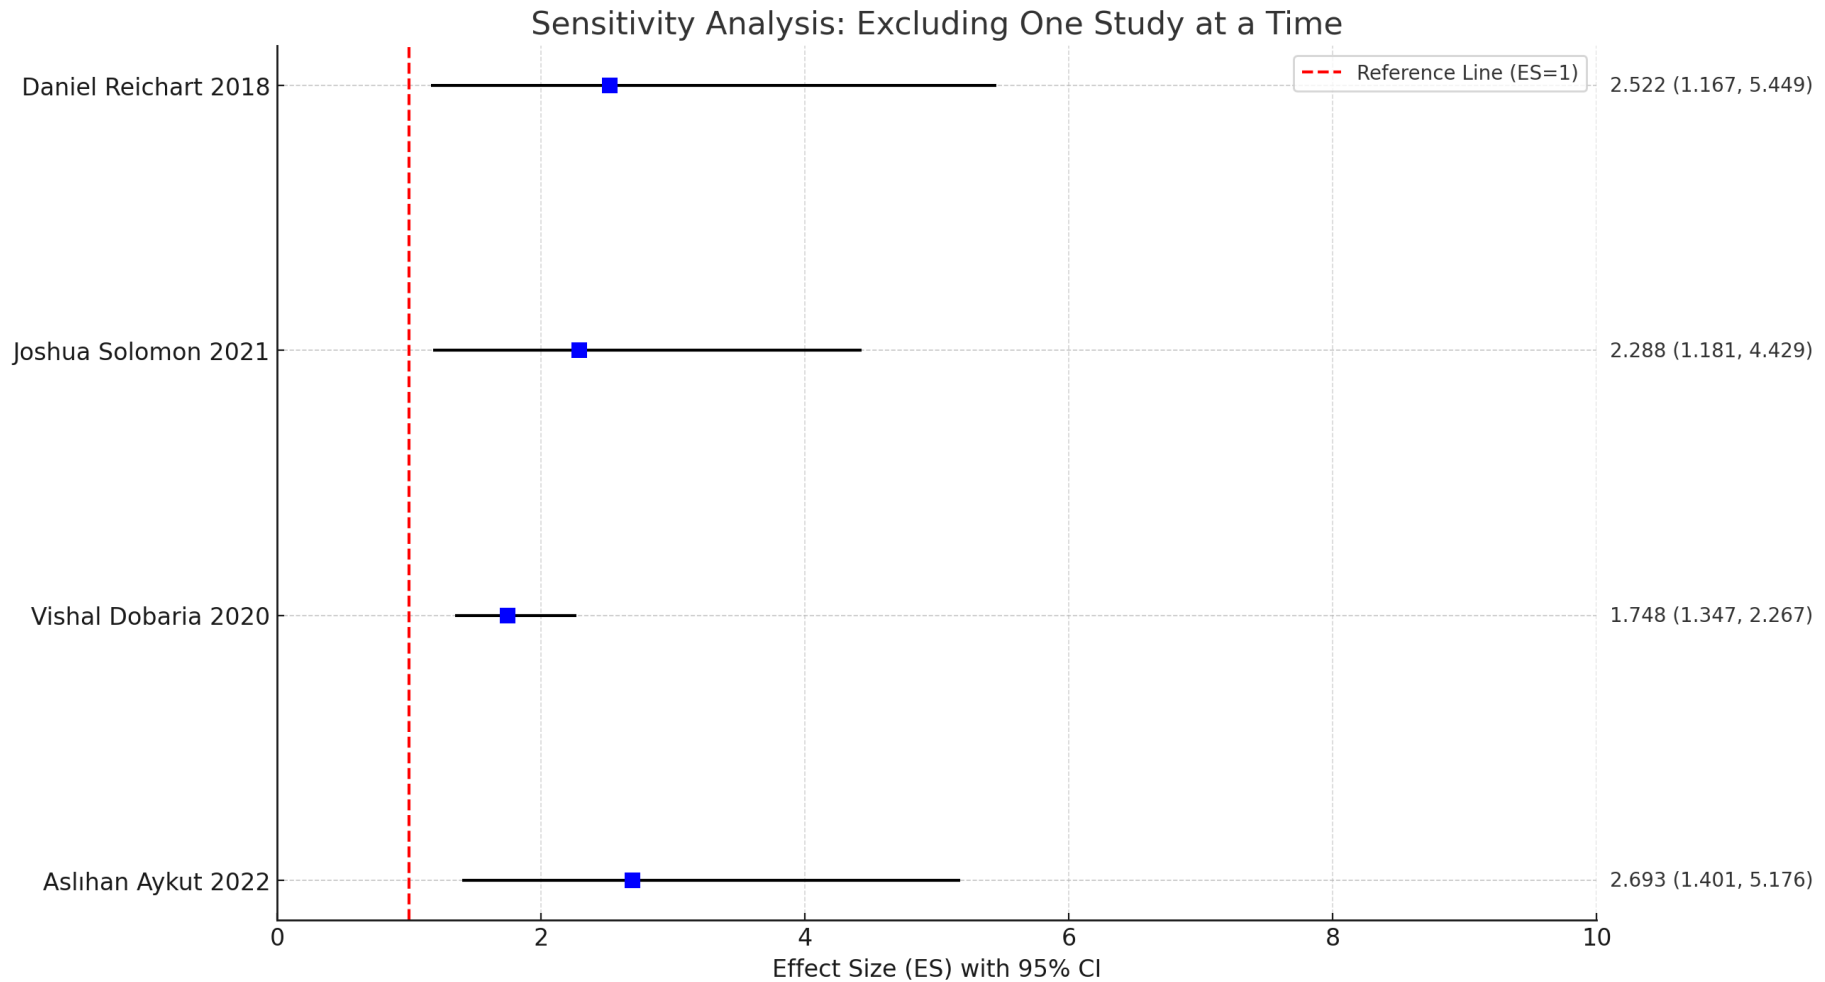

Supplement: 12893_2024_2728_MOESM3_ESM.pdf [file 12893_2024_2728_MOESM3_ESM.pdf]
